# Supplementary material
Source: publisher site journal article supplement (https://www.dovepress.com/article/500429)
Supplement: Supplementary file 1 [file get_supplementary_file.php]

**Supplementary Materials**

**Title：Association between urinary glyphosate concentrations and the prevalence of chronic obstructive pulmonary disease: evidence from NHANES 2013–2018**

**Table S1. Logistic regression of the association between urine glyphosate and COPD after [imputation](https://dl.acm.org/doi/10.1145/3654920) for missing covariates data(n=3084)**

| **Variable** | **Model 1** | | **Model 2** | | **Model 3** | | **Model 4** | |
| --- | --- | --- | --- | --- | --- | --- | --- | --- |
| **OR (95%CI)** | ***P*** | **OR (95%CI)** | ***P*** | **OR (95%CI)** | ***P*** | **OR (95%CI)** | ***P*** |
| Ln-transformed urinary glyphosate (ng/ml) | 1.30(1.05-1.62) | 0.018 | 1.31(1.05-1.63) | 0.018 | 1.32(1.02-1.71) | 0.038 | 1.31(1.01-1.70) | 0.046 |
| Categories |  |  |  |  |  |  |  |  |
| Tertile1 (≤0.218ng/ml) | Reference |  | Reference |  | Reference |  | Reference |  |
| Tertile2 (0.219-0.468ng/ml) | 1.57(0.82-2.99) | 0.166 | 1.60(0.84-3.03) | 0.145 | 1.43(0.75-2.73) | 0.266 | 1.44(0.76-2.71) | 0.249 |
| Tertile3 (≥ 0.469ng/ ml) | 1.90(1.10-3.30) | 0.023 | 1.94(1.11-3.41) | 0.022 | 2.04(1.02-3.47) | 0.043 | 1.87(1.01-3.44) | 0.046 |
| *P* for trend |  | 0.022 |  | 0.020 |  | 0.041 |  | 0.045 |

OR, odds ratio; CI, confidence interval; COPD, chronic obstructive pulmonary disease.

Model 1 did not adjust for covariates.

Model 2 adjusted for covariates including age, sex, race.

Model 3 further adjusted for education level, marital status, body mass index, physical activity, poverty income ratio, smoking status, and drinking status.

Model 4 further adjusted for history of hypertension, chronic kidney disease, stroke, hyperlipidemia and diabetes mellitus.

**Table S2. Logistic regression of the association between urine glyphosate and COPD without CKD participants. (n=1969)**

| **Variable** | **Model 1** | | **Model 2** | | **Model 3** | | **Model 4** | |
| --- | --- | --- | --- | --- | --- | --- | --- | --- |
| **OR (95%CI)** | ***P*** | **OR (95%CI)** | ***P*** | **OR (95%CI)** | ***P*** | **OR (95%CI)** | ***P*** |
| Ln-transformed urinary glyphosate (ng/ml) | 1.40(1.12-1.76) | 0.004 | 1.38(1.09-1.76) | 0.009 | 1.42(1.07-1.90) | 0.018 | 1.45(1.09-1.92) | 0.012 |
| Categories |  |  |  |  |  |  |  |  |
| Tertile1 (≤0.214ng/ml) | Reference |  | Reference |  | Reference |  | Reference |  |
| Tertile2 (0.215-0.457ng/ml) | 2.53(1.14-5.65) | 0.024 | 2.37(1.07-5.25) | 0.034 | 2.05(0.86-4.86) | 0.101 | 2.14(0.95-4.79) | 0.064 |
| Tertile3 (≥ 0.478ng/ ml) | 2.34(1.18-4.65) | 0.017 | 2.28(1.09-4.74) | 0.029 | 2.27(1.05-4.89) | 0.037 | 2.47(1.18-5.17) | 0.018 |
| *P* for trend |  | 0.019 |  | 0.031 |  | 0.033 |  | 0.020 |

OR, odds ratio; CI, confidence interval; COPD, chronic obstructive pulmonary disease.

Model 1 did not adjust for covariates.

Model 2 adjusted for covariates including age, sex, race.

Model 3 further adjusted for education level, marital status, body mass index, physical activity, poverty income ratio, smoking status, and drinking status.

Model 4 further adjusted for history of hypertension, stroke, hyperlipidemia and diabetes mellitus.
